# Supplementary material for: Ru/hydroxyapatite as a dual-functional catalyst for efficient transfer hydrogenolytic cleavage of aromatic ether bonds without additional bases
Source: Royal Society of Chemistry journal article supplement (doi:10.1039/c9gc02336d), 2019-01-01
Supplement: c9gc02336d1.pdf [file c9gc02336d1.pdf]

Supporting Information for:

**Ru/Hydroxyapatite as a Dual-Functional Catalyst for Efficient  
Transfer Hydrogenolytic Cleavage of Aromatic Ether Bonds without  
Additional Bases**

Manli Hua,<sup>a,b</sup> Jinliang Song,<sup>\*a,c</sup> Chao Xie,<sup>a,b</sup> Haoran Wu,<sup>a,b</sup> Yue Hu,<sup>a,b</sup> Xin Huang,<sup>a,b</sup>  
and Buxing Han<sup>\*a,b,c</sup>

<sup>a</sup>*Beijing National Laboratory for Molecular Science, CAS Key Laboratory of Colloid and Interface and Thermodynamics, CAS Research/Education Center for Excellence in Molecular Sciences, Institute of Chemistry, Chinese Academy of Sciences, Beijing 100190, China.*

<sup>b</sup>*School of Chemistry and Chemical Engineering, University of Chinese Academy of Sciences, Beijing 100049, China.*

<sup>c</sup>*Physical Science Laboratory, Huairou National Comprehensive Science Center, No. 5 Yanqi East Second Street, Beijing 101400, China.*

**E-mails:** songjl@iccas.ac.cn; hanbx@iccas.ac.cn

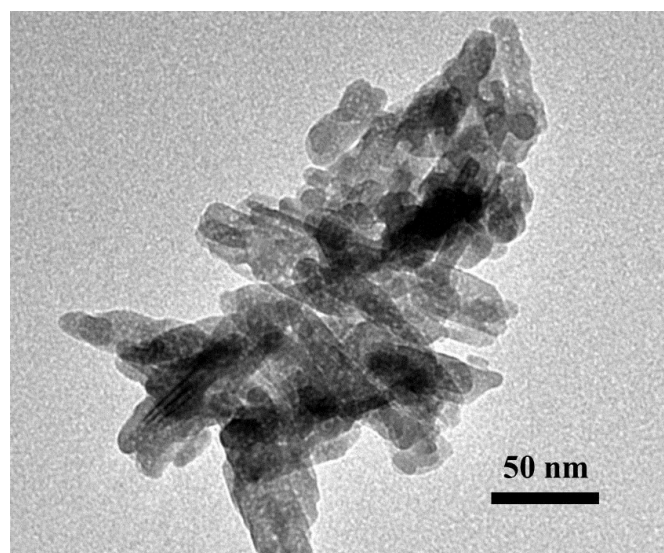

**Fig. S1.** The TEM image of hydroxylapatite.

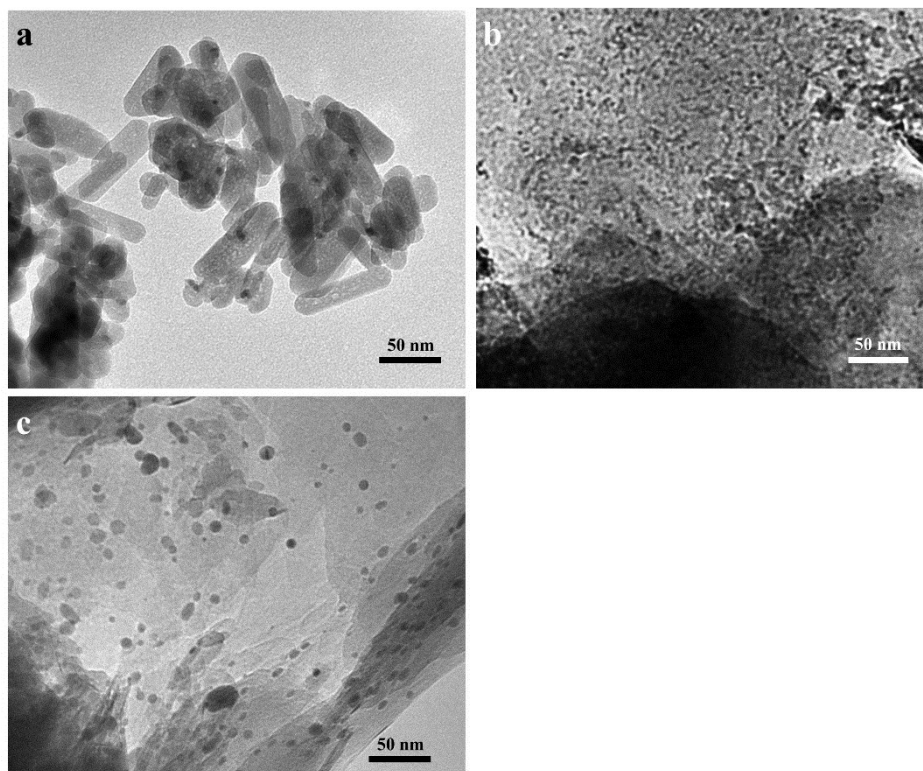

**Fig. S2.** The TEM images of Pd/hydroxylapatite (a), Ru/montmorillonite (b) and Pd/montmorillonite (c).

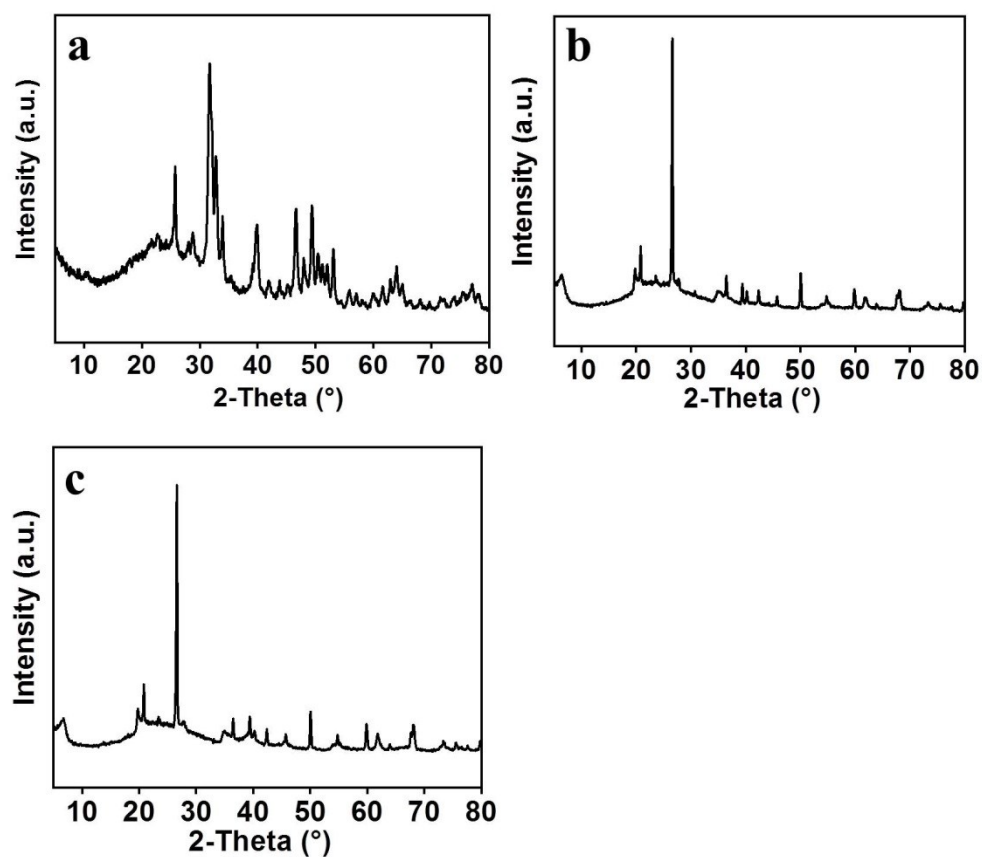

**Fig. S3.** XRD patterns of Pd/hydroxylapatite (a), Ru/montmorillonite (b) and Pd/montmorillonite (c).

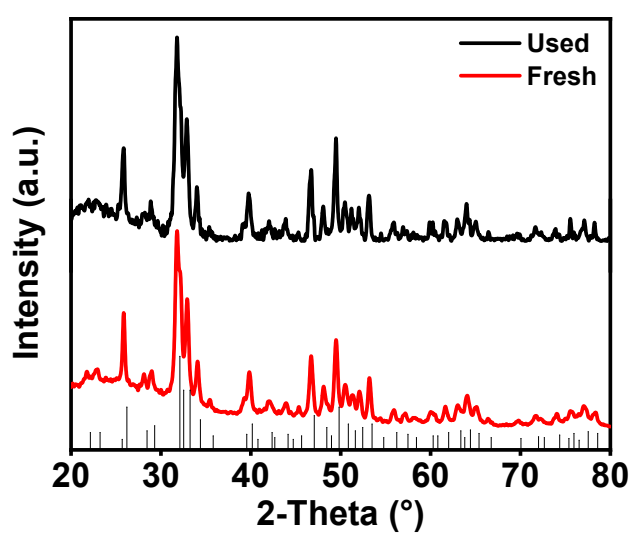

**Fig. S4.** XRD patterns of the fresh and used Ru/hydroxyapatite.

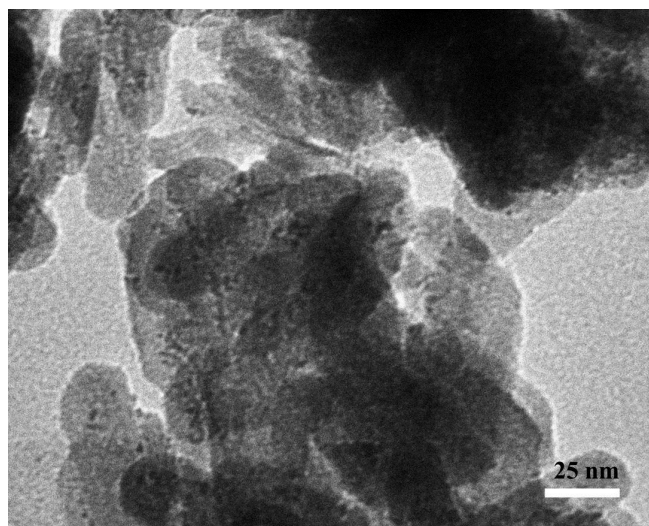

**Fig. S5.** TEM image of the used Ru/hydroxyapatite.

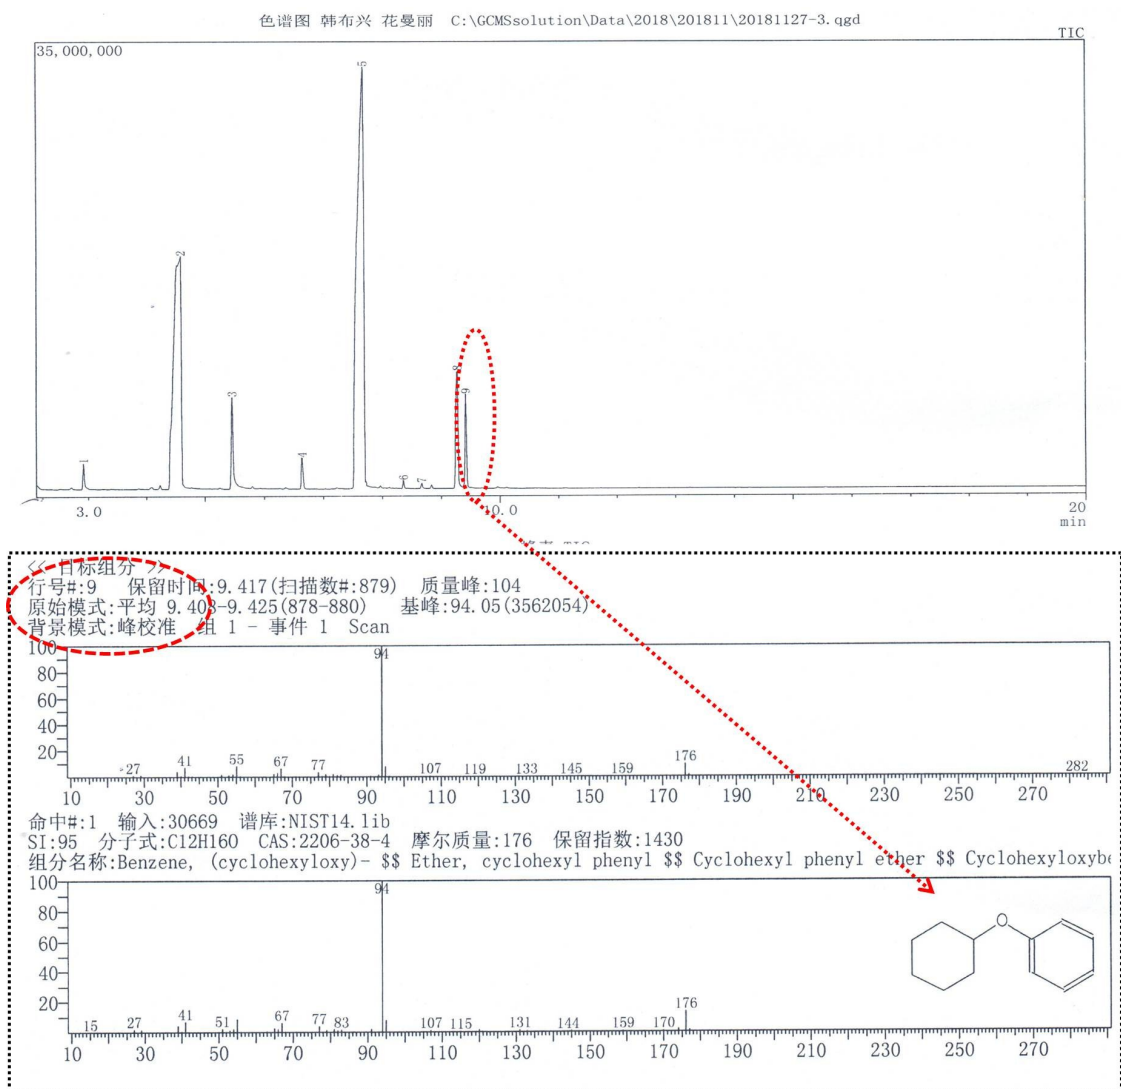

**Fig. S6.** GC-MS of cyclohexyl phenyl ether in reaction mixture. Reaction conditions: Ru/hydroxyapatite, 0.05 g (0.8 mol% Ru); diphenyl ether, 1 mmol; isopropanol, 4.0 g (66 mmol); reaction time, 4 h; reaction temperature, 150 °C.

**Table S1.** The comparison of the catalytic activity for commercial Ru/C and Ru/hydroxyapatite.

| Entry | Substrate                                                                                     | Catalyst <sup>a</sup> | t<br>(h) <sup>a</sup> | T<br>(°C) <sup>a</sup> | C<br>(%) <sup>a</sup> | Y (mmol) <sup>a</sup>                                                                                                                                                                                                                                                                                                                                                                                                                                                                 |
|-------|-----------------------------------------------------------------------------------------------|-----------------------|-----------------------|------------------------|-----------------------|---------------------------------------------------------------------------------------------------------------------------------------------------------------------------------------------------------------------------------------------------------------------------------------------------------------------------------------------------------------------------------------------------------------------------------------------------------------------------------------|
| 1     | 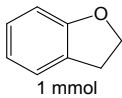<br>1 mmol   | Ru/C                  | 10                    | 150                    | 55                    | <br>0.03 <br>0.05 <br>0.08 <br>0.31 <br>0.05           |
| 2     | <br>1 mmol   | Ru/hydroxyapatite     | 10                    | 150                    | 100                   | <br>0.05 <br>0.04 <br>0.11 <br>0.43 <br>0.10         |
| 3     | <br>1 mmol | Ru/C                  | 10                    | 150                    | 81                    | <br>0.56 <br>0.17 <br>0.14 <br>0.15 <br>0.44 |
| 4     | <br>1 mmol | Ru/hydroxyapatite     | 10                    | 150                    | 100                   | <br>0.82 <br>0.20 <br>0.10 <br>0.20 <br>0.62 |

<sup>a</sup>The amount of Ru/C and Ru/hydroxyapatite (with the same Ru usage, 0.8 mol%) was 15 and 50 mg, respectively. t = reaction time, T = reaction temperature, C = conversion, and Y = Yields of major products. The values under the corresponding products were their generated amount.

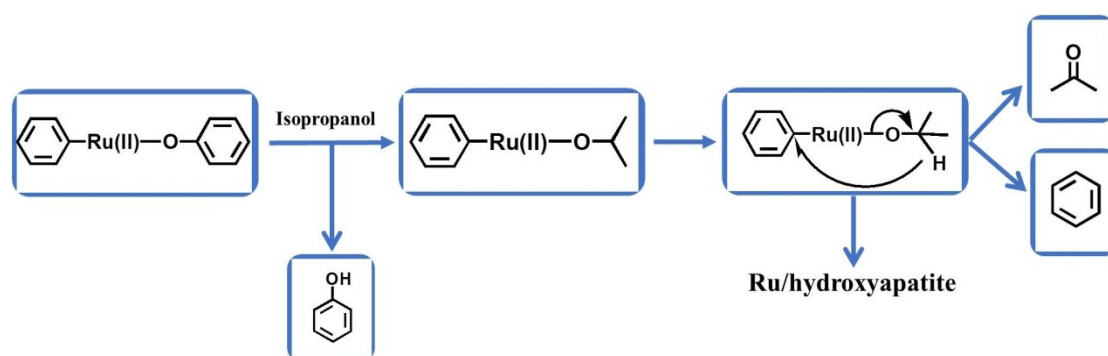

**Scheme S1.** The generation of benzene and phenol from the phenyl phenoxyl Ru(II) complex with the assistant of isopropanol.
